# Supplementary material for: Development and Validation of a Prognostic Autophagy-Related Gene Pair Index Related to Tumor-Infiltrating Lymphocytes in Early-Stage Lung Adenocarcinoma
Source: PubMed Central journal article supplement (PMC8488280; doi:10.3389/fcell.2021.719011), 2021-09-20

**Supplementary Figure 1.** Quantitative real-time polymerase chain reaction (qRT-PCR) data of patients in the Union Hospital cohort.





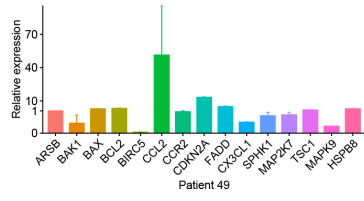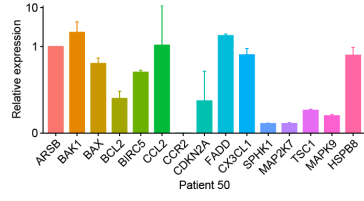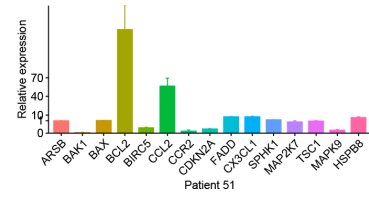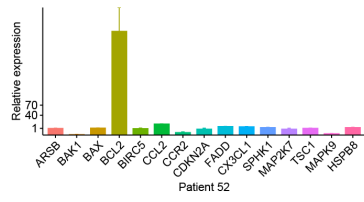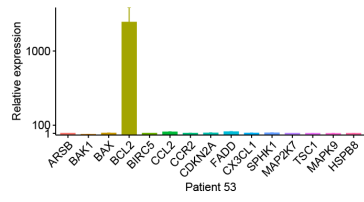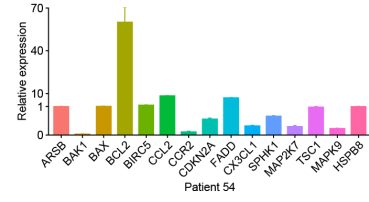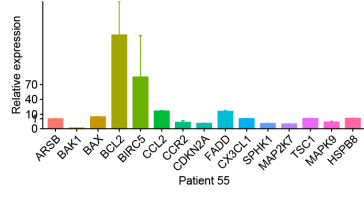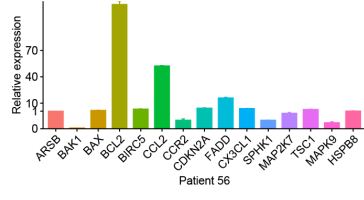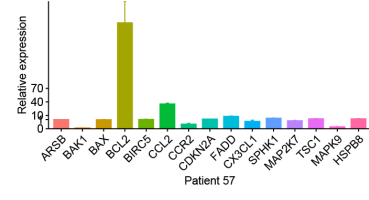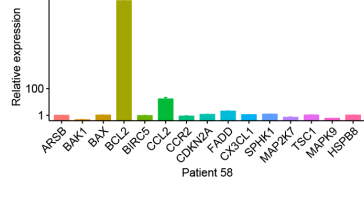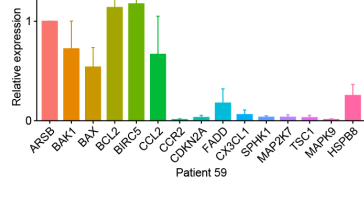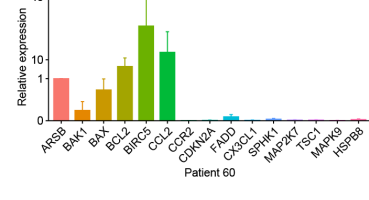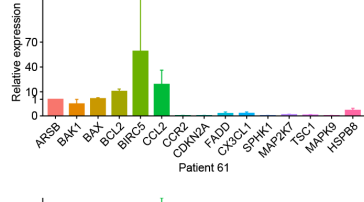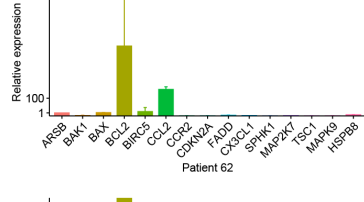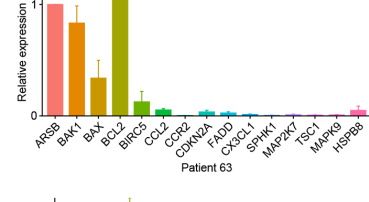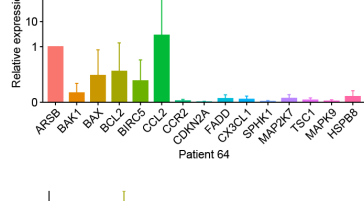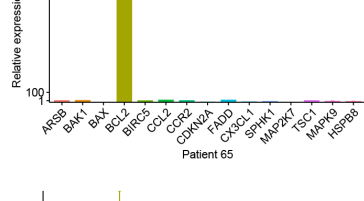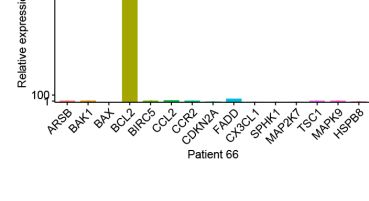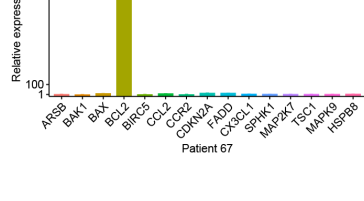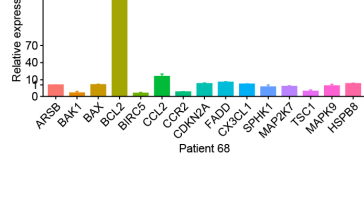

Supplement: Image_1.pdf [file Image_1.pdf]
